# Supplementary material for: Nano/micro structured porous Li4Ti5O12synthesized by a polyethylene glycol assisted hydrothermal method for high rate lithium-ion batteries
Source: Royal Society of Chemistry journal article supplement (doi:10.1039/c4ra07786e), 2014-09-29
Supplement: c4ra07786e1.pdf [file c4ra07786e1.pdf]

## Supporting Information

### Nano/micro structured porous $\text{Li}_4\text{Ti}_5\text{O}_{12}$ synthesized by polyethylene glycol assistant hydrothermal method for high rate lithium-ion batteries

Fengling Zhang,<sup>b</sup> Bin Xu,<sup>\*a</sup> Gaoping Cao,<sup>c</sup> Mo Chu,<sup>b</sup> Ning Qiao,<sup>a</sup> Gang Wei<sup>a</sup> and Yusheng Yang<sup>c</sup>

<sup>a</sup> State Key Laboratory of Chemical Resource Engineering, Beijing Key Laboratory of Electrochemical Process and Technology for Materials, Beijing University of Chemical Technology, Beijing 100029, China. E-mail: binxumail@163.com; Fax: +86-10-64434907

<sup>b</sup> School of Chemical and Environmental Engineering, China University of Mining and Technology (Beijing), Beijing 100083, China

<sup>c</sup> Research Institute of Chemical Defense, Beijing 100191, China

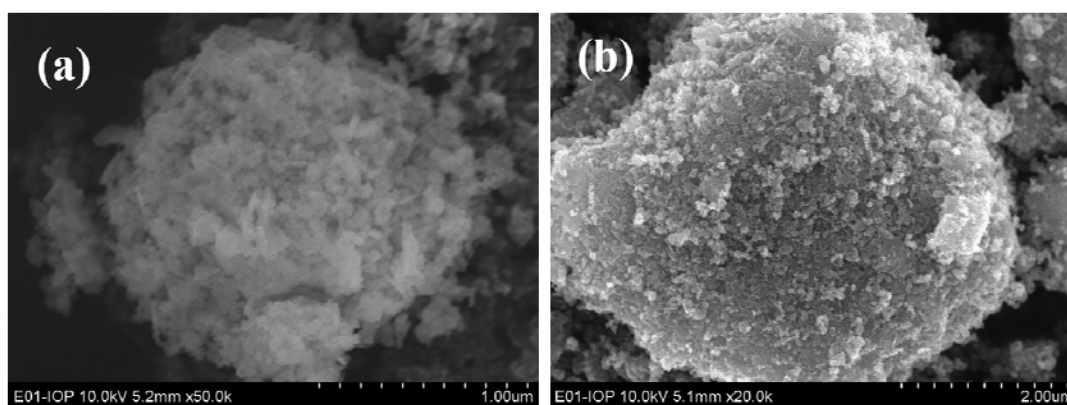

**Fig. S1.** SEM images of PLTO-1 (a) and PLTO-3 (b).

**Table 1.** Grain size of  $\text{Li}_4\text{Ti}_5\text{O}_{12}$  samples

| Sample  | PEG<br>(g) | $S_{\text{BET}}$<br>( $\text{m}^2 \text{g}^{-1}$ ) | Vt<br>( $\text{cm}^3 \text{g}^{-1}$ ) | Grain size<br>(nm) | Capacity ( $\text{mA g}^{-1}$ ) |     |     |     |     |
|---------|------------|----------------------------------------------------|---------------------------------------|--------------------|---------------------------------|-----|-----|-----|-----|
|         |            |                                                    |                                       |                    | 1C                              | 2C  | 5C  | 10C | 20C |
| LTO     | 0          | 50.7                                               | 0.34                                  | 28.6               | 160                             | 154 | 140 | 120 | 91  |
| P-LTO-1 | 0.25       | 55.3                                               | 0.35                                  | 22.3               | 156                             | 150 | 143 | 134 | 111 |
| P-LTO-2 | 0.50       | 80.1                                               | 0.45                                  | 16.9               | 160                             | 157 | 152 | 144 | 132 |
| P-LTO-3 | 0.75       | 67.6                                               | 0.46                                  | 22.6               | 146                             | 137 | 125 | 106 | 76  |

**Table 2.** Electrochemical performance of some typical  $\text{Li}_4\text{Ti}_5\text{O}_{12}$ .

| Synthesis method                         | Composition                                                                             | Current<br>(C) | Capacity<br>(mAh/g) | Reference |
|------------------------------------------|-----------------------------------------------------------------------------------------|----------------|---------------------|-----------|
| Sol-gel, Solvothermal                    | $\text{Li}_4\text{Ti}_5\text{O}_{12}$ hollow microspheres<br>assembled by nanoparticles | 10             | 115.6               | [1]       |
| Solvothermal, $\text{N}_2$ treatment     | carbon-coated $\text{Li}_4\text{Ti}_5\text{O}_{12}$<br>mesoporous nanoparticles         | 10             | 137                 | [2]       |
| electrospinning                          | 1D $\text{Li}_4\text{Ti}_5\text{O}_{12}$ nanofibers                                     | 10             | 138                 | [3]       |
| spray drying, solid-state<br>calcination | nano-micron sized $\text{Li}_4\text{Ti}_5\text{O}_{12}$                                 | 20             | 111.9               | [4]       |
| Solvothermal, annealing                  | micro/nanoscale $\text{Cu}/\text{Li}_4\text{Ti}_5\text{O}_{12}$                         | 20             | 122.9               | [5]       |
| aerosol deposition                       | $\text{Li}_4\text{Ti}_5\text{O}_{12}$ thin film                                         | 20             | 125                 | [6]       |
| sol/gel and hydrothermal                 | nanoflower-like $\text{Li}_4\text{Ti}_5\text{O}_{12}$                                   | 20             | 126                 | [7]       |
| carbon pre-coating, ball<br>milling      | nitrogen-doped carbon coated<br>$\text{Li}_4\text{Ti}_5\text{O}_{12}$                   | 20             | 128.2               | [8]       |
| PEG-assistant hydrothermal,<br>annealing | Nano/micro structured porous<br>$\text{Li}_4\text{Ti}_5\text{O}_{12}$ (PLTO-2)          | 10<br>20       | 144<br>132          | Present   |

**References:**

1. Y. H. Yin, J. J. Xu, Z. X. Cao, H. Y. Yue and S. T. Yang, *Mater. Lett.*, 2013, **108**, 21.
2. W. Fang, X. Q. Cheng, P. J. Zuo, Y. L. Ma and G. Yin, *Electrochim. Acta*, 2013, **93**, 173.
3. M. R. Jo, Y. S. Jung and Y. M. Kang, *Nanoscale*, 2012, **4**, 6870.
4. F. Wu, Z. Wang, X. Li, H. Guo, P. Yue, X. Xiong, Z. He and Q. Zhang, *Electrochim. Acta*, 2012, **78**, 331.
5. N. Li, J. Liang, D. Wei, Y. Zhu and Y. Qian, *Electrochim. Acta*, 2014, **123**, 346.
6. R. Inada, K. Shibukawa, C. Masada, Y. Nakanishi and Y. Sakurai, *J. Power Sources*, 2014, **253**, 181.
7. Y. S. Lin, M. C. Tsai, J. G. Duh, *J. Power Sources*, 2012, **214**, 314.
8. H. Li, L. Shen, X. Zhang, J. Wang, P. Nie, Q. Che and B. Ding, *J. Power Sources*, 2013, **221**, 122.
